# Supplementary material for: Association Between the Number of Daily Activities and Frailty in Older Adults Using a Community Salon: A Cross-Sectional Study
Source: Research Square preprint supplement (doi:10.21203/rs.3.rs-7126933/v1), 2025-07-24
Supplement: Supplementary file 1 [file 237a5e407d30ae0c3f402d31.xlsx]

## Sheet: table１
Table1 Participants' Basic Characteristics
Variables		Total, n	=	271
Frailty
	Robust, n (%)	101	(	37.2694	)
	Prefrailty, n (%)	110	(	40.5904	)
	Frailty, n (%)	60	(	22.1402	)
Sex
	Male n (%)	23	(	8.48708	)
	Female n (%)	236	(	87.0849	)
	Missing information, n (%)	12	(	4.42804	)
Smoking
	Yes, n (%)	1	(	0.369004	)
	No, n (%)	263	(	97.048	)
	Missing information, n (%)	7	(	2.58303	)
Drinking
	Yes, n (%)	89	(	32.8413	)
	No, n (%)	173	(	63.8376	)
	Missing information, n (%)	9	(	3.32103	)
Educational attainment
	<10 years, n (%)	50	(	18.4502	)
	≥10 years, n (%)	205	(	75.6458	)
	Missing information, n (%)	16	(	5.90406	)
Living arrangement
	Lives alone, n (%)	115	(	42.4354	)
	Lives with others, n (%)	147	(	54.2435	)
	Missing information, n (%)	9	(	3.32103	)
Number of diseases
	No diseases, n (%)	69	(	25.4613	)
	With at least one disease, n (%)	202	(	74.5387	)
Exercise habits
	Yes, n (%)	94	(	34.6863	)
	No, n (%)	158	(	58.3026	)
	Missing information, n (%)	19	(	7.01107	)
Use of ICT
	Yes, n (%)	195	(	71.9557	)
	No, n (%)	65	(	23.9852	)
	Missing information, n (%)	11	(	4.05904	)
ICT, Information and Communication Technology
