# Supplementary material for: Association Between the Number of Daily Activities and Frailty in Older Adults Using a Community Salon: A Cross-Sectional Study
Source: Research Square preprint supplement (doi:10.21203/rs.3.rs-7126933/v1), 2025-07-24
Supplement: Supplementary file 2 [file 5197046bdd73d098a81aaec2.xlsx]

## Sheet: table 2
Table2 Comparison of Variables by Frailty Status
		Robust				Prefrailty				Frailty				p-value
Variable
Ongoing activities, median (IQRs)		28	(	24-32	)	24	(	20-28	)	22	(	18-24	)	**
Activities of interest, median (IQRs)		4	(	0.0-8.0	)	5	(	0.0-12.0	)	6	(	0.0-12.0	)	NS
Housing density, median (IQRs)		0.31	(	0.19-0.38	)	0.34	(	0.21-0.38	)	0.37	(	0.24-0.38	)	NS
Population density of the neighborhood, median (IQRs)		22.2	(	16.7-28.6	)	27.2	(	14.9-34.1	)	27.2	(	20.6-34.1	)	NS
Rate of aging population, median (IQRs)		0.292971	(	0.26-0.32	)	0.28	(	0.25-0.32	)	0.28	(	0.27-0.32	)	NS
Number of parks, median (IQRs)		2	(	0.0-6.0	)	1	(	0.0-3.0	)	1	(	0.0-6.0	)	NS
Number of grocery stores, median (IQRs)		0	(	0.0-0.0	)	0	(	0.0-0.0	)	1	(	0.0-1.0	)	NS
Number of bus stops, median (IQRs)		1	(	0.0-3.0	)	1	(	0.0-2.0	)	1	(	0.0-2.0	)	NS
Age, median (IQRs)		77	(	74-82	)	82	(	76-84	)	82	(	80-85	)	**
Sex														NS
	Male, n (%)	6	(	2.21402	)	11	(	4.05904	)	7	(	2.58303	)
	Female, n (%)	95	(	35.0554	)	99	(	36.5314	)	53	(	19.5572	)
Smoking														NS
	Yes, n (%)	1	(	0.369004	)	1	(	0.369004	)	1	(	0.369004	)
	No, n (%)	100	(	36.9004	)	109	(	40.2214	)	59	(	21.7712	)
Drinking														NS
	Yes, n (%)	30	(	11.0701	)	44	(	16.2362	)	21	(	7.74908	)
	No, n (%)	71	(	26.1993	)	66	(	24.3542	)	39	(	14.3911	)
Educational attainment														NS
	< 10 years, n (%)	15	(	5.53506	)	28	(	10.3321	)	9	(	3.32103	)
	≥ 10 years, n (%)	86	(	31.7343	)	82	(	30.2583	)	51	(	18.8192	)
Living arrangement														NS
	Lives alone, n (%)	42	(	15.4982	)	48	(	17.7122	)	28	(	10.3321	)
	Lives with others, n (%)	59	(	21.7712	)	62	(	22.8782	)	32	(	11.8081	)
Number of diseases														NS
	No diseases, n (%)	29	(	10.7011	)	30	(	11.0701	)	10	(	3.69004	)
	With at least one disease, n (%)	72	(	26.5683	)	80	(	29.5203	)	50	(	18.4502	)
Exercise habits														**
	Yes, n (%)	56	(	20.6642	)	36	(	13.2841	)	20	(	7.38007	)
	No, n (%)	45	(	16.6052	)	74	(	27.3063	)	40	(	14.7601	)
Use of ICT														**
	Yes, n (%)	89	(	32.8413	)	76	(	28.0443	)	38	(	14.0221	)
	No, n (%)	12	(	4.42804	)	34	(	12.5461	)	22	(	8.11808	)
	*p < 0.05, **p < 0.01
	IQRs, interquartile ranges
	ICT, Information and Communication Technology
	NS, not significant
