# Supplementary material for: Association Between the Number of Daily Activities and Frailty in Older Adults Using a Community Salon: A Cross-Sectional Study
Source: Research Square preprint supplement (doi:10.21203/rs.3.rs-7126933/v1), 2025-07-24
Supplement: Supplementary file 3 [file 7a6c97d919756cf43f1a0450.xlsx]

## Sheet: table 3
Table3 Results of Multiple Regression Analysis for Frailty
	Model 1									Model 2
Variable	β (SE)				95% CI			p-value	VIF	β (SE)				95% CI			p-value	VIF
(Intercept)	3.04719	(	0.176952	)	2.69879	–	3.39559			1.89988	(	0.714912	)	0.492128	–	3.31	0.00836
Ongoing activities, median (IQRs)	−0.04	(	0.007258	)	−0.05	–	-0.0235768	3.65e-07	1.1367	−0.03	(	0.0075253	)	−0.05	–	-0.0195628	7.59e-06	1.22215
Exercise habits	−0.17	(	0.088187	)	−0.34	–	0.00550517	0.0577	1.06141	−0.14	(	0.089369	)	−0.32	–	0.0339923	0.11333	1.09013
Use of ICT	0.02	(	0.100716	)	−0.45	–	-0.0525751	0.0133	1.07316	−0.21	(	0.105292	)	−0.42	–	-0.00314927	0.04664	1.17297
Age										0.0139344	(	0.007595	)	0	–	0.0288898	0.06769	1.30544
Housing density, median (IQRs)										−0.04	(	0.399077	)	−0.82	–	0.749627	0.92778	1.63572
Rate of aging population, median (IQRs)										0	(	0.006487	)	−0.01	–	0.012122	0.92006	1.8183
Number of parks, median (IQRs)										−0.02	(	0.0214001	)	−0.06	–	0.0258625	0.44758	1.60842
Number of grocery stores, median (IQRs)										0.11	(	0.135591	)	−0.16	–	0.375742	0.42327	1.80509
Number of bus stops, median (IQRs)										0.03	(	0.0389342	)	−0.04	–	0.110172	0.39027	1.34615
95% confidence interval
